# Supplementary material for: The synthesis of novel fluorescent bimetal nanoclusters for aqueous mercury detection based on aggregation-induced quenching
Source: Royal Society of Chemistry journal article supplement (doi:10.1039/d1ay00342a), 2021-01-01
Supplement: d1ay00342a1.pdf [file d1ay00342a1.pdf]

## **Synthesis of novel fluorescent bimetal nanoclusters for aqueous mercury detection based on aggregation-induced quenching**

**Fangfang Yu<sup>1</sup>, Peng Luo<sup>1</sup>, Yun Chen<sup>1</sup>, Hui Jiang, Xuemei Wang\***

State Key Laboratory of Bioelectronics, School of Biological Science and Medical Engineering,  
Southeast University, Nanjing 210096, China

\*Correspondence and requests for materials should be addressed to:

Xuemei Wang (Email: [xuewang@seu.edu.cn](mailto:xuewang@seu.edu.cn))

<sup>1</sup>Fangfang Yu, Peng Luo and Yun Chen contributed equally to this work.

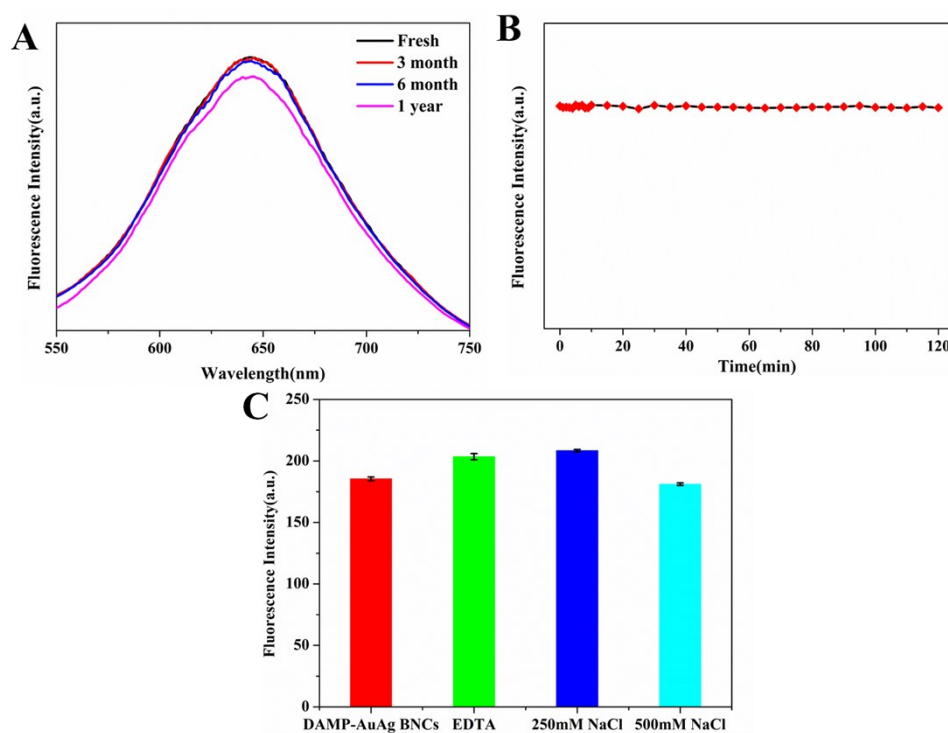

**Fig S1.** Fluorescence Stability of the as prepared DAMP-AuAg BNCs. (A) The time stability of DAMP-AuAg BNCs. DAMP-AuAg BNCs was incubated in ultrapure water at 4 °C; (B) Photostability of the as-prepared DAMP-AuAg BNCs under 473 nm excitation.; (C) The stability of DAMP-AuAg BNCs in the presence of EDTA and NaCl.

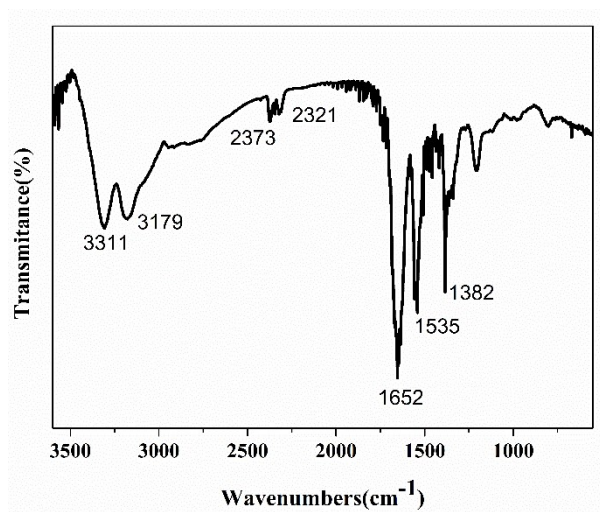

**Fig S2.** Infrared spectra of DAMP-AuAg BNCs.

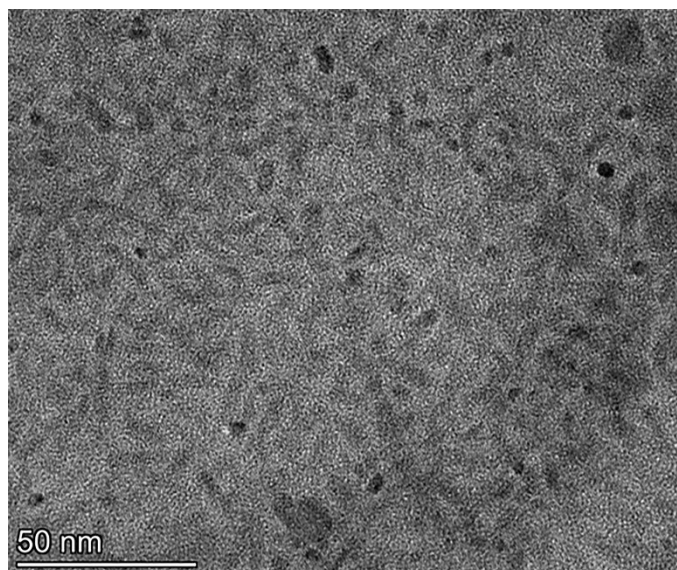

**Fig S3.** HRTEM image of DAMP-AuAg BNCs after addition of  $\text{Hg}^{2+}$  (50 $\mu\text{M}$ ) and sodium borohydride (15 $\mu\text{M}$ ).

**Table 1S.** Comparison of fluorescent probes based on Au nanoclusters for  $\text{Hg}^{2+}$  detection

| Nanomaterials     | Synthesized conditions         | Emission wavelength | Linear range           | Limit of detection | Ref.      |
|-------------------|--------------------------------|---------------------|------------------------|--------------------|-----------|
| cytidine@AuAg NCs | 80°C for 1 h                   | 560 nm              | 0.03-16 $\mu\text{M}$  | 30 nM              | 46        |
| BSA-Au NCs        | 37°C for 12 h                  | 640 nm              | 1-20 nM                | 0.5 nM             | 31        |
| AuNCs-Ag@Keratin  | 37°C for 12 h + 6 h            | 725 nm              | 2.44-2500 nM           | 2.31 nM            | 47        |
| BSA-Au@AgNCs      | 37°C for 12 h                  | 620 nm              | 0.20-2500 nM           | 0.10 nM            | 35        |
| BSA AuAg BNCs     | MW radiation (700 W) for 3 min | 577 nm              | 0.05-6.3 $\mu\text{M}$ | 13 nM              | 36        |
| DAMP-AuAg BNCs    | 70°C for 5 h                   | 640 nm              | 0.85-246 $\mu\text{M}$ | 20 nM              | This work |
